# Supplementary material
Source: PubMed Central journal article supplement (PMC6276712)
Supplement: jc.2018-00642.st1.pdf [file jc.2018-00642.st1.pdf]

**Supplemental Table 1.** Characteristics of cycles by progesterone category and ovarian stimulation medication (lowest 10<sup>th</sup> percentile vs. normal)

|                                   | Clomiphene Cycles<br>(n = 828 ) |                      | p-<br>value | Letrozole Cycles<br>(n = 843) |                   | p-<br>value | Gonadotropin Cycles<br>(n = 705) |                         | p-<br>value |
|-----------------------------------|---------------------------------|----------------------|-------------|-------------------------------|-------------------|-------------|----------------------------------|-------------------------|-------------|
|                                   | ≤15.8                           | >15.8                |             | ≤14.8                         | >14.8             |             | ≤9.1                             | >9.1                    |             |
| Progesterone group (ng/mL)<br>n   | 83                              | 745                  |             | 84                            | 759               |             | 71                               | 634                     |             |
| Age                               | 32.9(4.4)                       | 32.0(4.3)            | 0.091       | 32.9(4.5)                     | 32.1(4.2)         | 0.110       | 32.4(4.1)                        | 32.4(4.0)               | 0.716       |
| BMI                               | 32.8(8.6)                       | 26.6(6.9)            | <.001       | 31.3(9.2)                     | 27.2(6.2)         | <.001       | 30.0(7.1)                        | 26.3(6.3)               | <.001       |
| #follicles<br>≥ 16 mm             | 1.5(0.7)                        | 2.1(1.0)             | <.001       | 1.5(0.7)                      | 1.7(0.8)          | 0.022       | 1.9(1.1)                         | 2.2(1.5)                | 0.058       |
| Follicular phase length           | 13.6(2.5)                       | 12.0(1.9)            | <.001       | 12.3(2.4)                     | 11.9(2.0)         | 0.300       | 12.6(2.7)                        | 11.9(2.3)               | 0.005       |
| AMH (ng/mL)                       | 2.5(2.0)                        | 2.7(2.2)             | 0.615       | 2.2(1.6)                      | 2.6(1.9)          | 0.035       | 2.3(1.5)                         | 2.5(2.0)                | 0.957       |
| Duration infertility (months)     | 39.3(24.0)                      | 34.2(24.3)           | 0.045       | 34.2(25.2)                    | 34.8(25.7)        | 0.922       | 40.3(26.0)                       | 35.2(26.4)              | 0.028       |
| Peak estradiol                    | 379.7(279.3)                    | 653.4(379.0)         | <.001       | 140.0(92.9)                   | 164.7(113.1)      | 0.021       | 588.9(457.0)                     | 747.9(506.4)            | 0.002       |
| Peak estradiol/follicle<br>≥16 mm | 271.4(144.0)                    | 348.7(223.1)         | 0.004       | 108.9(86.1)                   | 111.1(87.6)       | 0.689       | 326.4(214.1)                     | 393.3(277.0)            | 0.059       |
| Dose medication                   | 572.3(132.6)<br>(mg)            | 532.9(110.4)<br>(mg) | 0.001       | 28.6(6.0)<br>(mg)             | 28.3(6.0)<br>(mg) | 0.439       | 788.0(642.0)<br>(units)          | 635.2(385.1)<br>(units) | 0.049       |
| Mid-luteal progesterone (ng/mL)   | 10.6(4.5)                       | 43.5(25.3)           |             | 9.9(4.5)                      | 32.7(15.3)        |             | 5.4(2.4)                         | 38.5(33.1)              |             |
| *Day of progesterone              | 8.6(0.9)                        | 8.7(0.8)             | 0.271       | 9.0(0.9)                      | 8.8(0.8)          | 0.113       | 8.3(0.8)                         | 8.7(0.8)                | 0.001       |
| Achieved pregnancy n, (%)         | 4 (4.8)                         | 89 (11.6)            | 0.064       | 2 (2.4)                       | 75 (9.9)          | 0.026       | 6 (8.5)                          | 115 (18.1)              | 0.040       |
| Clinical Pregnancy n, (%)         | 1 (1.2)                         | 60 (8.1)             | 0.024       | 2 (2.4)                       | 54 (7.1)          | 0.109       | 6 (8.5)                          | 80 (12.6)               | 0.309       |
| Live birth n, (%)                 | 1 (1.2)                         | 60 (8.1)             | 0.024       | 2 (2.4)                       | 53 (7.0)          | 0.158       | 6 (8.5)                          | 79 (12.5)               | 0.325       |

Values are expressed as means (standard deviation). Comparisons between groups are by parametric or non-parametric tests as appropriate. Age, BMI, AMH, and duration of infertility are baseline characteristics. Other variables are cycle specific. \*Day of progesterone is the interval between the day of progesterone blood draw and hCG injection.
